# Supplementary material for: Cinnamomum zeylanicum Blume Essential Oil Inhibits Metastatic Melanoma Cell Proliferation by Triggering an Incomplete Tumour Cell Stress Response
Source: MDPI journal article supplement (doi:10.3390/ijms24065698), 2023-03-16
Supplement: s1 [file s1]

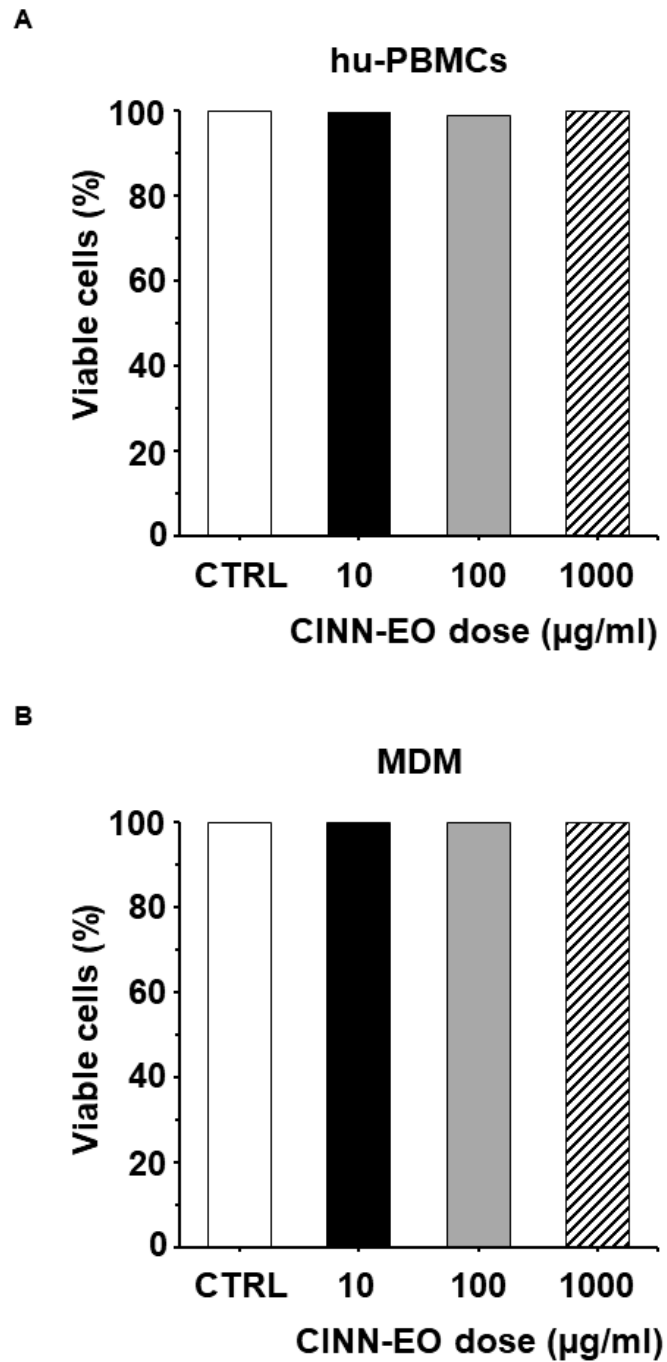

**Figure S1.** Dose-response effect of CINN-EO on healthy human PBMCs (A) and MDMs (B), obtained from healthy donors. CINN-EO was administered at the indicated concentrations for 24 h. The viable cells after each treatment is reported as percent of untreated control (CTRL).

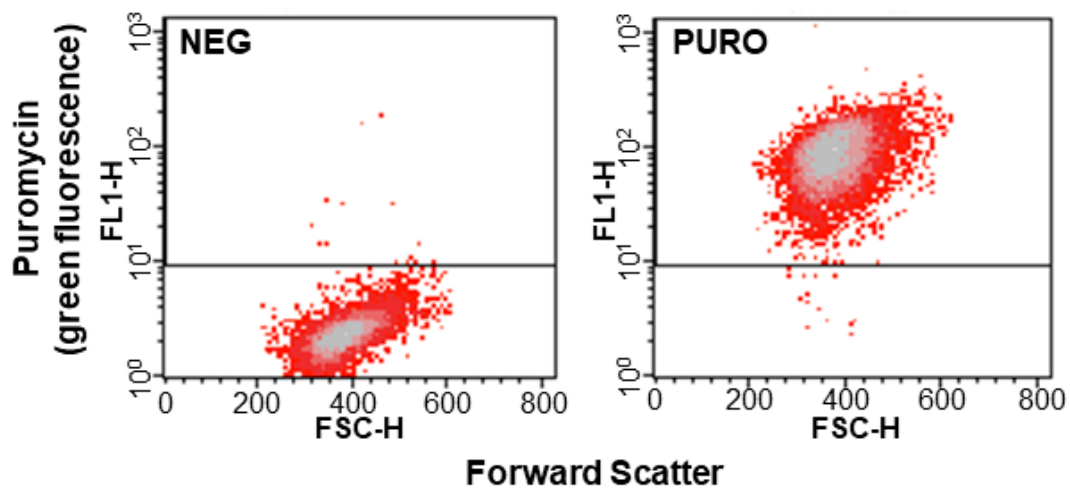

**Figure S2.** Representative cytograms of puromycin FACS expression. M14 cells were exposed to 1  $\mu$ M puromycin for 4 h and then analysed by FACS for immunofluorescence. NEG, negative control without primary antibody; PURO, puromycin.

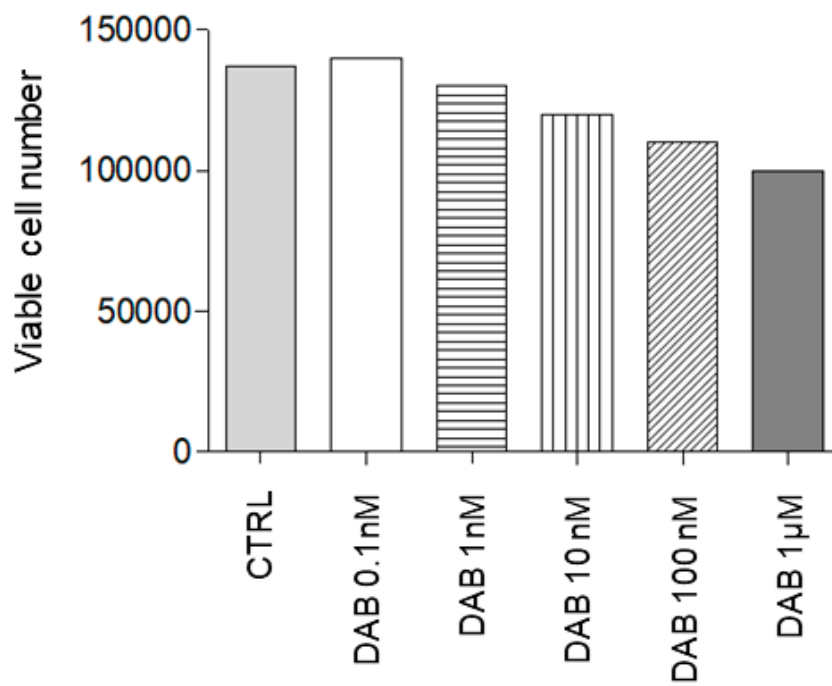

**Figure S3.** Dose-response effect of Dabrafenib (DAB) on M14 cells. DAB was administered at the indicated concentrations for 24 h. The number of viable cells after each treatment is reported.

**Table S1.** Compositions of the cinnamon essential oil samples.

| # <sup>a</sup> | RI<br>Lit. <sup>b</sup> | RI<br>Exp. <sup>c</sup> | Class/Compound                       | EO1         | EO2         | EO3         | EO4          | EO5         | EO6         |
|----------------|-------------------------|-------------------------|--------------------------------------|-------------|-------------|-------------|--------------|-------------|-------------|
|                |                         |                         |                                      | %           |             |             |              |             |             |
|                |                         |                         | <b>Monoterpene hydrocarbons (16)</b> | <b>7.48</b> | <b>8.36</b> | <b>0.23</b> | <b>11.07</b> | <b>9.95</b> | <b>3.26</b> |
| 3              | 927                     | 926                     | $\alpha$ -Thujene                    | 0.17        | 0.20        |             |              | 0.25        | 0.07        |
| 4              | 939                     | 933                     | $\alpha$ -Pinene                     | 1.16        | 1.34        | 0.08        | 1.48         | 1.07        | 0.74        |
| 5              | 954                     | 948                     | Camphene                             | 0.44        | 0.49        | 0.05        | 0.59         | 0.41        | 0.26        |
| 7              | 975                     | 972                     | Sabinene                             | 0.01        | 0.02        | 0.03        | 0.03         | 0.08        |             |
| 8              | 979                     | 975                     | $\beta$ -Pinene                      | 0.43        | 0.49        |             | 0.38         | 0.36        | 0.26        |
| 9              | 991                     | 987                     | Myrcene                              | 0.09        | 0.12        |             | 0.15         | 0.10        |             |
| 10             | 1003                    | 1000                    | $\alpha$ -Phellandrene               | 1.26        | 1.48        |             | 1.30         | 0.91        | 0.24        |
| 11             | 1009                    | 1015                    | $\delta$ -3-carene                   | 0.11        | 0.12        |             |              |             |             |
| 12             | 1017                    | 1014                    | $\alpha$ -Terpinene                  | 0.29        | 0.28        |             | 1.07         | 0.93        | 0.06        |
| 13             | 1025                    | 1022                    | <i>p</i> -Cymene                     | 1.85        | 1.88        | 0.02        | 1.26         | 1.18        | 1.06        |
| 14             | 1029                    | 1029                    | Limonene                             |             |             | 0.05        |              |             | 0.56        |
| 15             | 1030                    | 1028                    | $\beta$ -Phellandrene                | 1.53        | 1.77        |             | 4.34         | 4.26        |             |
| 17             | 1037                    | 1036                    | $\beta$ -Z-Ocimene                   | 0.01        | 0.04        |             | 0.06         | 0.06        |             |
| 19             | 1050                    | 1047                    | $\beta$ - <i>E</i> -Ocimene          | 0.03        | 0.03        |             | 0.04         | 0.04        |             |
| 20             | 1060                    | 1058                    | $\gamma$ -Terpinene                  |             |             |             | 0.19         | 0.18        |             |
| 22             | 1089                    | 1086                    | Terpinolene                          | 0.10        | 0.12        |             | 0.16         | 0.13        |             |
|                |                         |                         | <b>Oxygenated monoterpenes (14)</b>  | <b>4.95</b> | <b>5.22</b> | <b>0.13</b> | <b>3.62</b>  | <b>6.68</b> | <b>3.10</b> |
| 16             | 1031                    | 1031                    | 1,8-Cineole                          | 0.15        | 0.20        |             | 0.08         | 1.05        | 0.12        |
| 23             | 1097                    | 1097                    | Linalool                             | 4.18        | 4.38        |             | 1.29         | 3.82        | 2.64        |
| 26             | 1121                    | 1121                    | dehydro-Sabine Ketone                |             |             |             | 0.15         |             |             |
| 27             | 1122                    | 1122                    | <i>cis-p</i> -Menth-2-en-1-ol        |             |             |             | 0.11         | 0.13        |             |
| 28             | 1141                    | 1141                    | <i>trans-p</i> -Menth-2-en-1-ol      |             |             |             |              | 0.09        |             |
| 29             | 1146                    | 1157                    | Camphor                              | 0.01        | 0.03        |             |              |             |             |
| 31             | 1169                    | 1168                    | Borneol                              | 0.04        | 0.03        | 0.06        | 0.06         | 0.05        |             |
| 32             | 1177                    | 1177                    | Terpinen-4-ol                        | 0.19        | 0.17        |             | 1.27         | 0.53        | 0.07        |
| 33             | 1183                    | 1191                    | <i>p</i> -Cymen-8-ol                 | 0.03        | 0.04        |             |              |             |             |
| 34             | 1189                    | 1190                    | $\alpha$ -Terpineol                  | 0.36        | 0.37        |             | 0.48         | 0.83        | 0.26        |
| 36             | 1221                    | 1207                    | <i>cis</i> -Sabinene hydrate         |             |             |             | 0.06         | 0.05        |             |
| 44             | 1291                    | 1288                    | <i>trans</i> -Sabinyl acetate        |             |             | 0.07        |              |             |             |
| 47             | 1290                    | 1294                    | Thymol                               |             |             |             | 0.09         | 0.08        |             |
| 48             | 1299                    | 1302                    | Carvacrol                            |             |             |             | 0.02         | 0.05        |             |
|                |                         |                         | <b>Sesquiterpenes (29)</b>           | <b>4.87</b> | <b>4.80</b> | <b>0.75</b> | <b>3.36</b>  | <b>3.60</b> | <b>5.74</b> |
| 53             | 1377                    | 1379                    | $\alpha$ -Copaene                    |             |             | 0.15        | 0.11         | 0.13        | 0.61        |
| 55             | 1387                    | 1413                    | $\beta$ -Cubebene                    | 0.05        |             |             |              |             |             |
| 57             | 1408                    | 1426                    | <i>iso</i> -Caryophyllene            | 0.01        | 0.03        |             |              |             |             |
| 58             | 1419                    | 1425                    | $\beta$ -Caryophyllene               | 3.99        | 3.98        | 0.07        | 2.27         | 2.00        | 2.25        |
| 60             | 1460                    | 1455                    | <i>allo</i> -Aromadendrene           |             |             | 0.03        |              |             |             |
| 61             | 1455                    | 1461                    | $\alpha$ -Humulene                   | 0.65        | 0.65        |             | 0.42         | 0.34        | 0.39        |
| 62             | 1481                    | 1477                    | $\gamma$ -Muurolene                  |             |             | 0.05        |              |             |             |
| 63             | 1481                    | 1486                    | <i>ar</i> -Curcumene                 | 0.02        |             | 0.02        | 0.03         |             |             |

|           |             |             |                                                    |              |              |              |              |              |              |
|-----------|-------------|-------------|----------------------------------------------------|--------------|--------------|--------------|--------------|--------------|--------------|
| 64        | 1493        | 1505        | Guajene                                            | 0.03         | 0.04         |              |              |              |              |
| 65        | 1498        | 1490        | $\alpha$ -Selinene                                 |              |              |              |              | 0.04         |              |
| 66        | 1500        | 1501        | $\alpha$ -Muurolene                                |              |              | 0.02         | 0.04         | 0.06         |              |
| 67        | 1506        | 1502        | $\beta$ -Bisabolene                                |              |              | 0.03         |              | 0.07         |              |
| 68        | 1496        | 1515        | Viridiflorene                                      | 0.01         |              |              |              |              |              |
| 69        | 1516        | 1518        | $\beta$ -Curcumene                                 |              |              | 0.04         |              |              |              |
| 71        | 1523        | 1527        | $\delta$ -Cadinene                                 | 0.12         | 0.10         | 0.06         |              | 0.08         |              |
| 73        | 1546        | 1550        | $\alpha$ -Calacorene                               |              |              | 0.02         |              |              |              |
| 74        | 1572        | 1562        | Caryophyllene alcohol                              |              |              |              | 0.02         | 0.25         |              |
| 75        | 1563        | 1570        | <i>E</i> -Nerolidol                                |              |              | 0.06         |              |              |              |
| 76        | 1578        | 1581        | Spathulenol                                        |              |              | 0.09         | 0.08         | 0.06         | 0.09         |
| 77        | 1583        | 1594        | Caryophyllene oxide                                |              |              |              | 0.32         | 0.30         | 1.49         |
| 78        | 1585        | 1595        | Globulol                                           |              |              | 0.08         |              |              |              |
| 80        | 1608        | 1613        | Humulene epoxide                                   |              |              |              |              |              | 0.24         |
| 81        | 1629        | 1615        | 1- <i>epi</i> -Cubenol                             |              |              |              |              | 0.04         |              |
| 82        | 1640        | 1648        | <i>epi</i> - $\alpha$ -Cadinol                     |              |              |              |              | 0.05         |              |
| 83        | 1646        | 1652        | $\alpha$ -Muurolol                                 |              |              |              |              | 0.03         |              |
| 84        | 1660        | 1662        | Intermedeol                                        |              |              |              |              | 0.06         |              |
| 85        | 1670        | 1670        | 14-hydroxy-9- <i>epi</i> - <i>E</i> -Caryophyllene |              |              |              | 0.09         | 0.05         | 0.17         |
| 86        | 1682        | 1677        | Occidentalol acetate                               |              |              |              |              | 0.04         | 0.52         |
| 87        | 1686        | 1690        | $\alpha$ -Bisabolene                               |              |              | 0.02         |              |              |              |
|           |             |             | <b>Diterpenes (1)</b>                              |              |              |              | <b>0.20</b>  |              |              |
| 90        | 1974        | 1977        | Sclarene                                           |              |              |              | 0.20         |              |              |
|           |             |             | <b>Others (30)</b>                                 | <b>80.73</b> | <b>80.07</b> | <b>97.51</b> | <b>80.72</b> | <b>79.15</b> | <b>85.03</b> |
| 1         | 891         | 888         | Styrene                                            |              |              | 0.06         |              |              |              |
| 2         | 931         | 925         | Cumene                                             |              |              |              | 0.24         |              |              |
| 6         | 960         | 960         | Benzaldehyde                                       | 0.31         | 0.36         | 0.48         | 0.23         | 0.16         | 0.15         |
| 18        | 1045        | 1049        | Salicylaldehyde                                    |              |              | 0.08         |              |              |              |
| 21        | 1065        | 1072        | Acetophenone                                       | 0.01         | 0.01         | 0.02         |              |              |              |
| 24        | 1100        | 1100        | Isopentyl-2-methyl butanoate                       |              |              |              |              | 0.04         |              |
| 25        | 1107        | 1107        | Phenylethyl alcohol                                |              |              | 0.27         | 0.02         |              |              |
| 30        | 1161        | 1161        | Hydrocinnamaldehyde                                |              |              | 0.37         | 0.38         | 0.46         |              |
| 35        | 1196        | 1195        | Estragole                                          |              |              |              | 0.14         |              |              |
| 37        | 1219        | 1218        | <i>Z</i> -Cinnamaldehyde                           | 0.22         | 0.25         | 0.45         | 0.51         | 0.49         | 0.07         |
| 38        | 1227        | 1233        | Hydrocinnamyl alcohol                              | 0.01         | 0.02         | 0.05         | 0.03         |              |              |
| 39        | 1239        | 1241        | Cuminaldehyde                                      |              |              |              | 0.02         |              |              |
| 40        | 1242        | 1245        | <i>o</i> -Anisaldehyde                             |              |              | 0.37         |              |              |              |
| 41        | 1258        | 1252        | Phenyl ethyl acetate 2                             |              |              | 0.03         |              |              |              |
| 42        | 1250        | 1260        | Chavicol                                           |              |              |              |              |              | 0.10         |
| <b>43</b> | <b>1270</b> | <b>1285</b> | <b><i>E</i>-Cinnamaldehyde</b>                     | <b>55.26</b> | <b>53.04</b> | <b>87.04</b> | <b>66.25</b> | <b>65.82</b> | <b>1.31</b>  |
| 45        | 1287        | 1293        | Safrole                                            | 0.03         | 0.54         |              |              |              | 0.96         |
| 46        | 1285        | 1290        | <i>E</i> -Anethole                                 | 0.07         | 0.03         |              | 0.03         |              |              |
| 49        | 1303        | 1306        | <i>E</i> -Cinnamyl alcohol                         |              |              |              | 0.17         | 0.08         | 0.10         |
| 50        | 1319        | 1356        | $\alpha$ -methyl Cinnamaldehyde                    | 0.01         | 0.05         |              |              |              |              |
| <b>51</b> | <b>1359</b> | <b>1361</b> | <b>Eugenol</b>                                     | <b>21.35</b> | <b>21.69</b> | <b>0.17</b>  | <b>1.80</b>  | <b>6.78</b>  | <b>75.77</b> |
| 52        | 1368        | 1371        | Hydrocinnamyl acetate                              | 0.02         | 0.06         |              | 0.13         | 0.08         | 0.08         |

|           |             |             |                                        |             |             |             |             |             |      |
|-----------|-------------|-------------|----------------------------------------|-------------|-------------|-------------|-------------|-------------|------|
| 54        | 1404        | 1403        | Methyl eugenol                         | 0.01        | 0.50        |             | 0.02        |             |      |
| 56        | 1394        | 1419        | Vanillin                               | 0.04        | 0.02        |             |             |             |      |
| 59        | 1446        | 1451        | <i>E</i> -Cinnamyl acetate             | 1.36        | 1.65        | 0.96        | 8.43        | 3.25        | 1.66 |
| 70        | 1523        | 1527        | Eugenol acetate                        | 0.77        | 0.78        |             |             |             | 2.13 |
| <b>72</b> | <b>1529</b> | <b>1541</b> | <b><i>o</i>-Methoxy cinnamaldehyde</b> | <b>0.03</b> | <b>0.03</b> | <b>7.13</b> | <b>0.52</b> | <b>0.30</b> |      |
| 79        | 1613        | 1609        | Tetradecanal                           | 0.29        | 0.11        |             | 0.02        | 0.07        |      |
| 88        | 1760        | 1779        | Benzyl benzoate                        | 1.06        | 1.04        | 0.04        | 1.75        | 1.63        | 3.30 |
| 89        | 1860        | 1870        | Phenethyl benzoate                     |             |             |             | 0.08        |             |      |

|  |  |  |                                 |              |              |              |              |              |              |
|--|--|--|---------------------------------|--------------|--------------|--------------|--------------|--------------|--------------|
|  |  |  | <b>Monoterpene hydrocarbons</b> | <b>7.48</b>  | <b>8.36</b>  | <b>0.23</b>  | <b>11.07</b> | <b>9.95</b>  | <b>3.26</b>  |
|  |  |  | <b>Oxygenated monoterpenes</b>  | <b>4.95</b>  | <b>5.22</b>  | <b>0.13</b>  | <b>3.62</b>  | <b>6.68</b>  | <b>3.10</b>  |
|  |  |  | <b>Sesquiterpenes</b>           | <b>4.87</b>  | <b>4.80</b>  | <b>0.75</b>  | <b>3.36</b>  | <b>3.60</b>  | <b>5.74</b>  |
|  |  |  | <b>Diterpenes</b>               |              |              |              | <b>0.20</b>  |              |              |
|  |  |  | <b>Others</b>                   | <b>80.73</b> | <b>80.07</b> | <b>97.51</b> | <b>80.72</b> | <b>79.15</b> | <b>85.03</b> |
|  |  |  | Total                           | 98.03        | 98.45        | 98.62        | 98.97        | 99.38        | 97.13        |

<sup>a</sup> The number refers to the elution order, and the values (relative peak areas) represent the averages of 3 determinations.

<sup>b</sup> Literature retention index (RI). <sup>c</sup> Retention index (RI) relative to a standard mixture of *n*-alkanes on an SPB-5 column.

**Table S2.** Sequences of the primers used in this study

| <b>Gene annotation</b> | <b>Forward primer 5'-3'</b> | <b>Reverse primer 5'-3'</b> | <b>Tm</b> |
|------------------------|-----------------------------|-----------------------------|-----------|
| SLC40A1                | TTGGCCGACTACCTGACCTCTGC     | ACACAGACACCGCAAAGTGCC       | 58        |
| SLC11A1                | CGACTGGCTGCACGTCTGGG        | GGTGATGAGGACGCCACCCC        | 60        |
| TfR1                   | AGCCAACTGCTTTCATTTGTGAGGG   | ACGGAAGAAGTCTCCACGAGCAG     | 58        |
| FTH1                   | CATGACGACCGCGTCCACCTC       | TCAAAGCCACATCATCGCGGTC      | 58        |
| HMOX1                  | CCAGGTGACCCGAGACGGCT        | AGAGCTGGGCAGGTCCAGGG        | 59        |
| HAMP1                  | AAGCTCAAGACCCAGCAGTGGG      | AAGTTGTCCCGTCTGTTGTGGG      | 63        |
| Tf                     | ACCTGAAGCCTGTGGTGGCA        | TGCCTCGAAGCTGGTTCATCTGG     | 58        |
| DGKK                   | CAACCTGCATCATCATCGCA        | CTGGGCAGCGTTCTTGTATC        | 59        |
| SLC7A11                | AAGCTCATTACAGCTGTGGG        | TCTCTTCCTGAAAAGGCGTC        | 57        |
| GSR                    | CAACGAGCTTTACCCCGATG        | GCAGCATTTTCATCACACCCA       | 59        |
| NOS2                   | ACAGCACATTCAGATCCCCA        | AACACGTTCTTGGCATGCAT        | 59        |
| OXR1                   | TCTTCAACTTCTGAGGAGGAGG      | CATTCTCTTGAACCAAAGGGTC      | 57        |
| SOD2                   | AGGATCCACTGCAAGGAACA        | TAGTAAGCGTGCTCCCACAC        | 59        |
| SOD3                   | CTGGGTGCAGCTCTCTTTTCA       | GAGCAGGCAGGAACACAGTAG       | 60        |
| Nrf2                   | TCTGTTGCTCAGGTAGCCCC        | TCTGTGGAGAGGATGCTGCTG       | 61        |
| P53                    | AGGCCTTGGAAGTCAAGGAT        | CCCTTTTTGGACTTCAGGTG        | 60        |
